# Supplementary material for: Comparative transcriptomic analysis reveals genetic divergence and domestication genes in Diospyros
Source: BMC Plant Biol. 2019 May 30;19:227. doi: 10.1186/s12870-019-1839-2 (PMC6543618; doi:10.1186/s12870-019-1839-2)
Supplement: Supplementary file 6 — Table S2. Ten top-hits for the nine Diospyros samples annotated using the NCBI NR database with BLASTX. (XLSX 11 kb) [file 12870_2019_1839_MOESM6_ESM.xlsx]

## Sheet: table4 物种分布统计表
Table S2. Ten top-hits for nine Diospyros samples annotated to NCBI NR database with BLASTX.
Sample	Species	Count
DC	Vitis vinifera	3304
DC	Theobroma cacao	1997
DC	Juglans regia	1709
DC	Cephalotus follicularis	1494
DC	Sesamum indicum	1323
DC	Nelumbo nucifera	1171
DC	Ziziphus jujuba	972
DC	Nicotiana tabacum	919
DC	Ipomoea nil	724
DC	Prunus mume	701
DJ	Vitis vinifera	2852
DJ	Theobroma cacao	1716
DJ	Juglans regia	1447
DJ	Cephalotus follicularis	1253
DJ	Sesamum indicum	1120
DJ	Nelumbo nucifera	1000
DJ	Ziziphus jujuba	805
DJ	Nicotiana tabacum	734
DJ	Prunus mume	604
DJ	Ipomoea nil	556
DG	Vitis vinifera	2828
DG	Theobroma cacao	1668
DG	Juglans regia	1458
DG	Cephalotus follicularis	1214
DG	Sesamum indicum	1120
DG	Nelumbo nucifera	1007
DG	Ziziphus jujuba	798
DG	Nicotiana tabacum	761
DG	Prunus mume	586
DG	Ipomoea nil	549
DKV	Vitis vinifera	3887
DKV	Theobroma cacao	2430
DKV	Cajanus cajan	2398
DKV	Juglans regia	2062
DKV	Cephalotus follicularis	1993
DKV	Sesamum indicum	1500
DKV	Nelumbo nucifera	1396
DKV	Nicotiana tabacum	1230
DKV	Ziziphus jujuba	1171
DKV	Nicotiana attenuata	987
DO	Vitis vinifera	3311
DO	Theobroma cacao	2088
DO	Juglans regia	1718
DO	Cephalotus follicularis	1585
DO	Cajanus cajan	1585
DO	Sesamum indicum	1333
DO	Nelumbo nucifera	1162
DO	Nicotiana tabacum	1003
DO	Ziziphus jujuba	985
DO	Nicotiana attenuata	820
DV	Vitis vinifera	3299
DV	Cajanus cajan	2402
DV	Theobroma cacao	2094
DV	Juglans regia	1725
DV	Cephalotus follicularis	1701
DV	Sesamum indicum	1292
DV	Nelumbo nucifera	1204
DV	Ziziphus jujuba	997
DV	Nicotiana tabacum	983
DV	Nicotiana attenuata	912
DL	Vitis vinifera	7397
DL	Theobroma cacao	5326
DL	Solanum lycopersicum	2373
DL	Cucumis sativus	1554
DL	Oryza sativa Japonica Group	1340
DL	Fragaria vesca subsp. vesca	1174
DL	Arabidopsis thaliana	1008
DL	Medicago truncatula	944
DL	Cicer arietinum	886
DL	Glycine max	864
DK	Vitis vinifera	7731
DK	Theobroma cacao	5773
DK	Solanum lycopersicum	2499
DK	Oryza sativa Japonica Group	1680
DK	Cucumis sativus	1662
DK	Fragaria vesca subsp. vesca	1269
DK	Arabidopsis thaliana	1211
DK	Medicago truncatula	1101
DK	Glycine max	1001
DK	Cicer arietinum	941
DD	Vitis vinifera	7288
DD	Theobroma cacao	5439
DD	Solanum lycopersicum	2311
DD	Cucumis sativus	1498
DD	Oryza sativa Japonica Group	1474
DD	Fragaria vesca subsp. vesca	1155
DD	Arabidopsis thaliana	1026
DD	Medicago truncatula	963
DD	Cicer arietinum	861
DD	Glycine max	860
